# Supplementary material for: Highly efficient overall water splitting over a porous interconnected network by nickel cobalt oxysulfide interfacial assembled Cu@Cu2S nanowires
Source: Royal Society of Chemistry journal article supplement (doi:10.1039/d0ta04638h), 2020-01-01
Supplement: d0ta04638h1.pdf [file d0ta04638h1.pdf]

## Supporting Information

### **High-efficient Overall Water Splitting Over Porous Interconnected Network by Nickel Cobalt Oxysulfide Interfacial Assembled Cu@Cu<sub>2</sub>S Nanowires**

*Duy Thanh Tran,<sup>a</sup> Van Hien Hoa,<sup>a</sup> Huu Tuan Le,<sup>a</sup> Nam Hoon Kim,<sup>a</sup> Joong Hee Lee<sup>a,b\*</sup>*

<sup>a</sup>Advanced Materials Institute for BIN Convergence Technology (BK21 Plus Global Program),  
Department of BIN Convergence Technology, Jeonbuk National University, Jeonju, Jeonbuk  
54896, Republic of Korea.

<sup>b</sup>Carbon Composite Research Center, Department of Polymer-Nanoscience and Technology,  
Jeonbuk National University, Jeonju, Jeonbuk 54896, Republic of Korea

\*Corresponding authors: E-Mail: [jhl@jbnu.ac.kr](mailto:jhl@jbnu.ac.kr) (Joong Hee Lee)

Fax: +82 832702341; Tel: +82 832702342

#### **Preparation of Cu@Cu<sub>2</sub>S NWs network**

For preparing Cu@Cu<sub>2</sub>S NWs, a working electrode of the Cu NWs on 3DF (1 cm x 1 cm) was dipped in an aqueous solution (50 mL) containing 0.75 M of thiourea, while Ag/AgCl and graphite rod were used as reference and counter electrode, respectively. An electrodeposition process was conducted at an applied potential of -1.0 V (vs. Ag/AgCl) for 100 s. After that, the sample was cleaned with water three times and was dried at 60 °C in a vacuum oven.

#### **Preparation of Cu@Cu<sub>2</sub>S@NiO<sub>1-x</sub>S<sub>x</sub> NWs (or Cu@Cu<sub>2</sub>S@CoO<sub>1-x</sub>S<sub>x</sub> NWs) network**

A piece of the Cu NWs on 3DF (1 cm x 1 cm), used as the working electrode, was dipped in an electrochemical cell containing 50 mL of water dispersed with 10 mM of Ni(NO<sub>3</sub>)<sub>2</sub> (or

Co(NO<sub>3</sub>)<sub>2</sub>) and 0.75 M of thiourea. Ag/AgCl and graphite rod were used as reference and counter electrode, respectively. An electrodeposition process was then carried out at an applied potential of -1.0 V (vs. Ag/AgCl) for 100 s. Subsequently, the obtained sample of Cu@Cu<sub>2</sub>S@NiO<sub>1-x</sub>S<sub>x</sub> NWs (or Cu@Cu<sub>2</sub>S@CoO<sub>1-x</sub>S<sub>x</sub> NWs) on 3DF was cleaned with water three times followed by drying at 60 °C in a vacuum oven before it was investigated physicochemical and electrochemical properties.

### Preparation of Cu@NiCoO<sub>2</sub> NWs network

For preparing Cu@NiCoO<sub>2</sub> NWs on 3DF, a working electrode based on a piece of the Cu NWs on 3DF (1 cm x 1 cm) was immersed in a 50 mL of aqueous solution containing 10 mM of Ni(NO<sub>3</sub>)<sub>2</sub> and 10 mM Co(NO<sub>3</sub>)<sub>2</sub>. An electrodeposition step was then conducted at an applied potential of -1.0 V (vs. Ag/AgCl) for 100 s. After the reaction finished, the obtained sample of Cu@NiCoO<sub>2</sub> NWs on 3DF was washed by water three times and dried at 60 °C in a vacuum oven.

### Turnover Frequency Calculations

Firstly, the ECSA was calculated according to C<sub>dl</sub> value of materials [1]. In this research, metal foam was applied as substrate to support catalyst, thus its C<sub>dl</sub> is much higher than that of a flat substrate having C<sub>dl</sub> between 0.02-0.06 mF cm<sup>-2</sup>. Therefore, the ECSA of materials could be assessed by following equation [2]:

$$A_{ECSA} = \frac{C_{dl} (catalyst)}{C_{dl} (foam substrate)}$$

where C<sub>dl (foam substrate)</sub> is around 1.7 mF cm<sup>-2</sup> measured in 1.0 M KOH medium [2].

Therefore, A<sub>ECSA</sub> of the Cu NWs (1.9 mF cm<sup>-2</sup>), Cu@NiCoO<sub>2</sub> NWs (3.3 mF cm<sup>-2</sup>), Cu@Cu<sub>2</sub>S@NiO<sub>1-x</sub>S<sub>x</sub> NWs (3.7 mF cm<sup>-2</sup>), Cu@Cu<sub>2</sub>S@CoO<sub>1-x</sub>S<sub>x</sub> NWs (2.9 mF cm<sup>-2</sup>), and

Cu@Cu<sub>2</sub>S@NiCoO<sub>2-x</sub>S<sub>x</sub> NWs (8.6 mF cm<sup>-2</sup>) could be estimated to be 1.118, 1.941, 2.176, 1.706, and 5.059 cm<sup>2</sup>.

We applied the following formula for evaluating the per site turnover frequency (TOF) [3,4]:

$$TOF = \frac{\text{number of total hydrogen turn over/cm}^2 \text{ of geometric area}}{\text{number of active sites/cm}^2 \text{ of geometric area}}$$

The total number of hydrogen turn overs was calculated from the current density according to:

$$\text{no. of } H_2 = (j \frac{mA}{cm^2}) (\frac{1Cs^{-1}}{1000 mA}) (\frac{1 mol e^-}{96485.3C}) (\frac{1 mol H_2}{2 mol e^-}) (\frac{6.023 \times 10^{23} H_2 \text{ molecules}}{1 mol H_2}) = 3.12 \times 10^{15} \frac{H_2/s}{cm^2} \text{ per } \frac{mA}{cm^2}$$

The number of active sites was evaluated from the roughness factor together with the unit cell, as seen in the case of Ni<sub>5</sub>P<sub>4</sub> and NiMoP<sub>2</sub>. [3] A same method was applied to evaluate TOF for our synthesized materials.

$$\text{Active sites}_{Cu} = \left( \frac{4 \text{ atom/unit cell}}{47.272 \text{ \AA}^3/\text{unit cell}} \right)^{\frac{2}{3}} = 1.927 \times 10^{15} \times \text{atoms cm}_{real}^{-2}$$

$$\text{Active sites}_{NiCoO_2} = \left( \frac{8 \text{ atom/unit cell}}{74.314 \text{ \AA}^3/\text{unit cell}} \right)^{\frac{2}{3}} = 2.263 \times 10^{15} \times \text{atoms cm}_{real}^{-2}$$

$$\text{Active sites}_{NiO_{1-x}S_x} = \left( \frac{4 \text{ atom/unit cell}}{72.9 \text{ \AA}^3/\text{unit cell}} \right)^{\frac{2}{3}} = 1.444 \times 10^{15} \times \text{atoms cm}_{real}^{-2}$$

$$\text{Active sites}_{CoO_{1-x}S_x} = \left( \frac{4 \text{ atom/unit cell}}{77.42 \text{ \AA}^3/\text{unit cell}} \right)^{\frac{2}{3}} = 1.387 \times 10^{15} \times \text{atoms cm}_{real}^{-2}$$

$$\text{Active sites}_{NiCoO_{2-x}S_x} = \left( \frac{8 \text{ atom/unit cell}}{74.314 \text{ \AA}^3/\text{unit cell}} \right)^{\frac{2}{3}} = 2.263 \times 10^{15} \times \text{atoms cm}_{real}^{-2}$$

Finally, TOF was can be calculated by an implied equation as following:

$$TOF = \frac{(3.12 \times 10^{15} \frac{H_2/s}{cm^2} \text{ per } \frac{mA}{cm^2}) |j|}{\text{Active sites} \times A_{ECSA}}$$

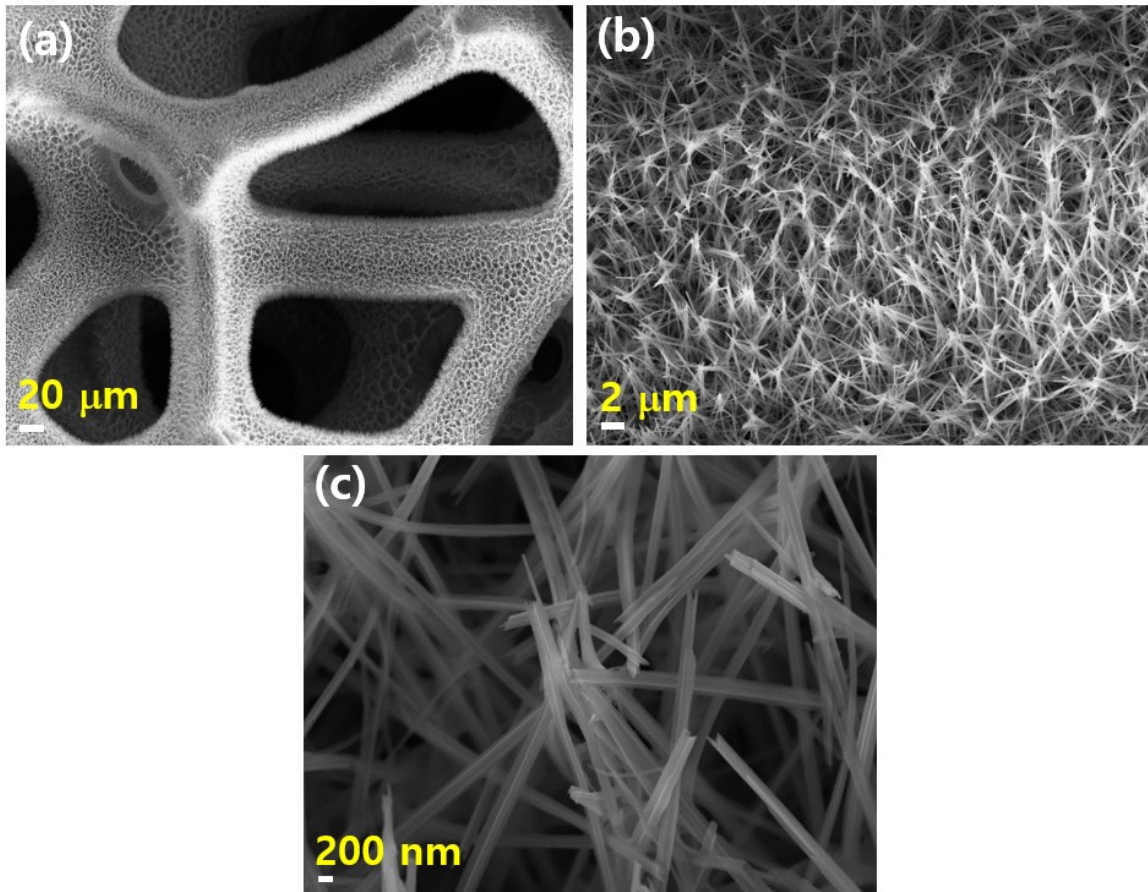

**Figure S1.** (a-c) SEM images at different magnifications of  $\text{Cu}(\text{OH})_2$  nanoneedles on 3DF.

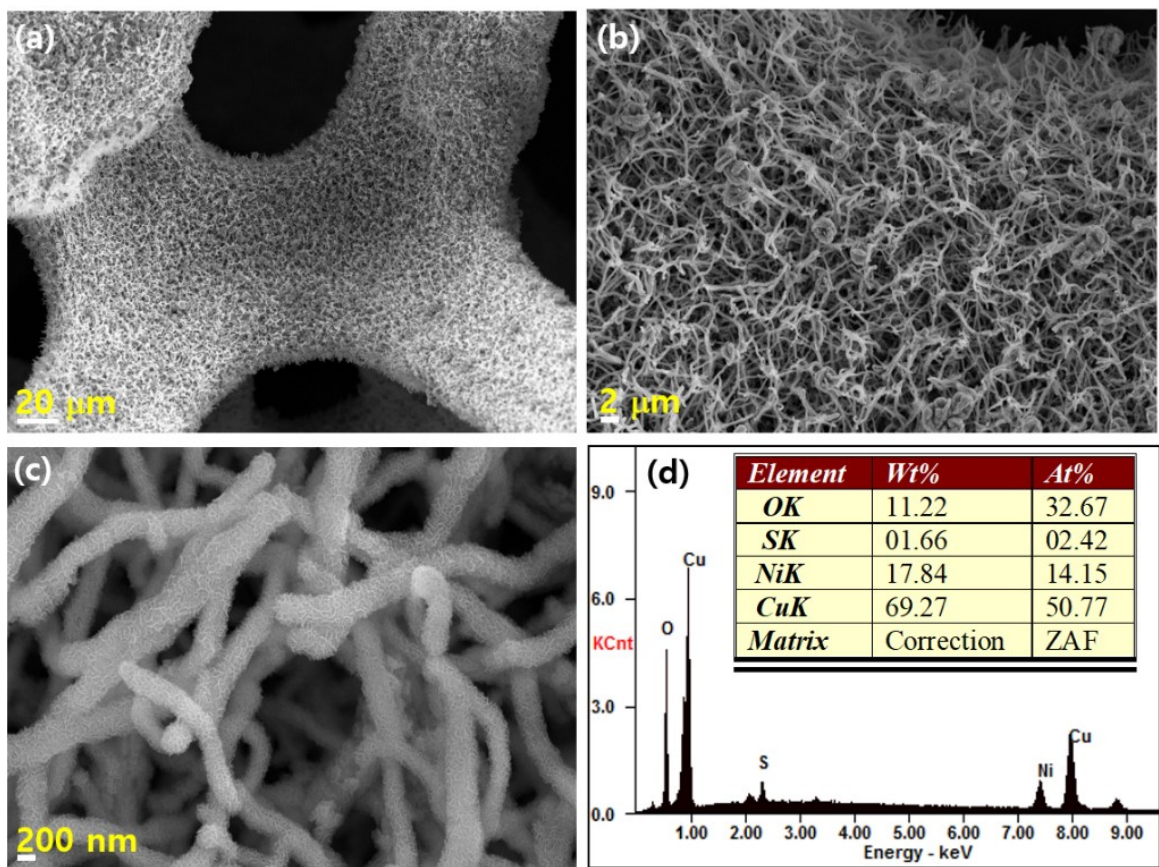

**Figure S2.** (a-c) SEM images and (d) EDAX spectrum of Cu@Cu<sub>2</sub>S@NiO<sub>1-x</sub>S<sub>x</sub> NWs on 3DF.

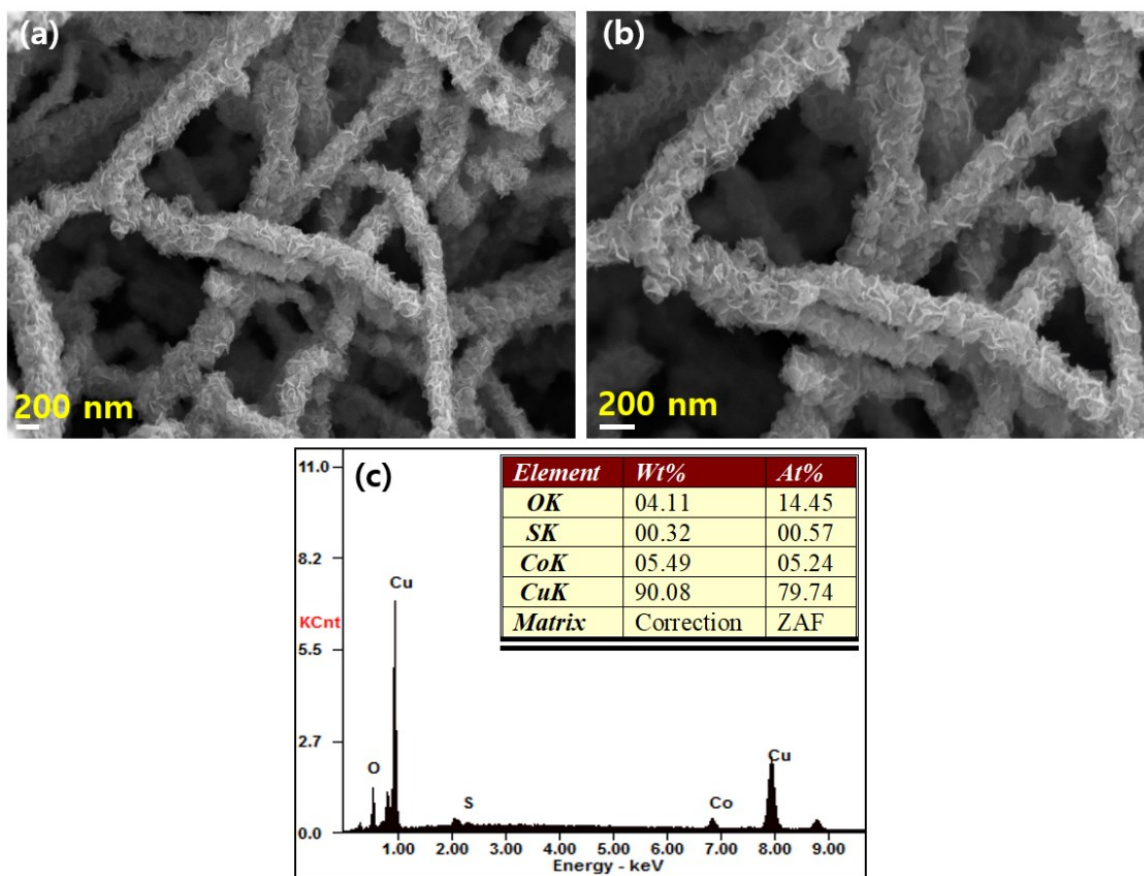

**Figure S3.** (a-b) SEM images and (c) EDAX spectrum of Cu@Cu<sub>2</sub>S@CoO<sub>1-x</sub>S<sub>x</sub> NWs on 3DF.



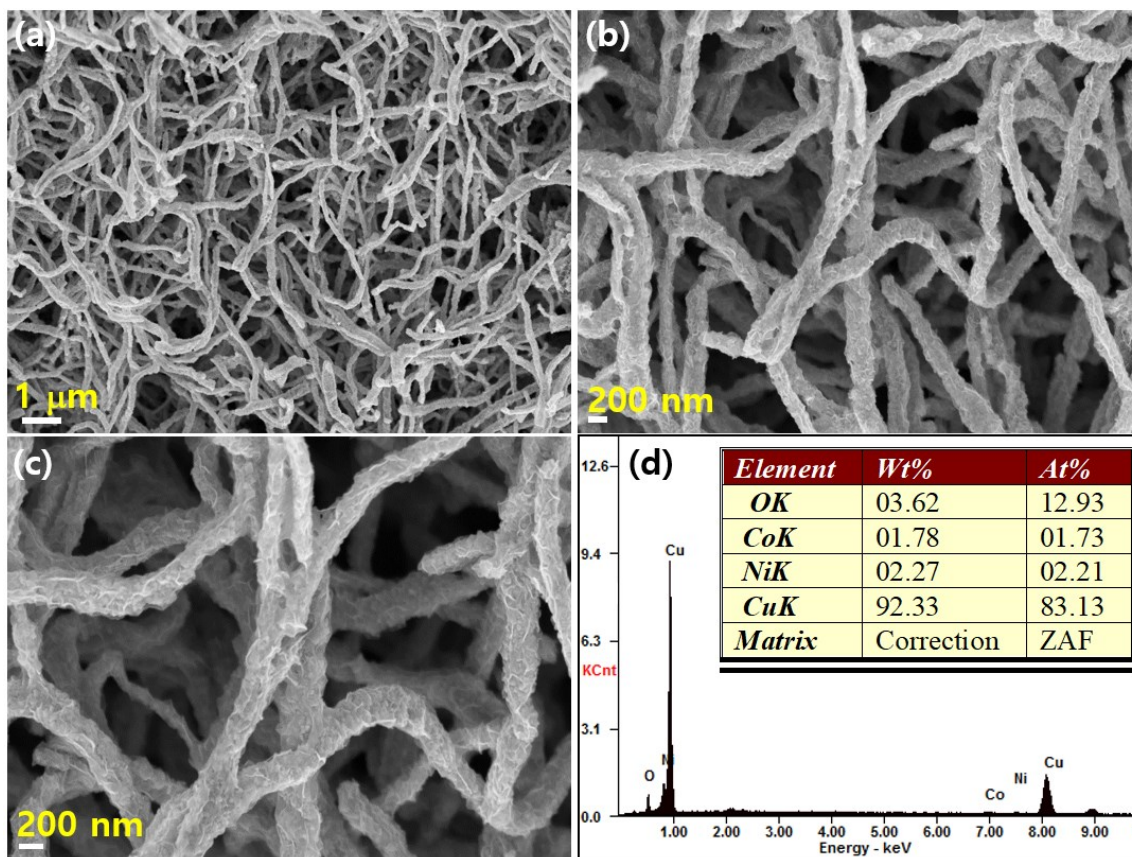

**Figure S4.** (a-c) SEM images and (d) EDAX spectrum of Cu@NiCoO<sub>2</sub> NWs on 3DF.

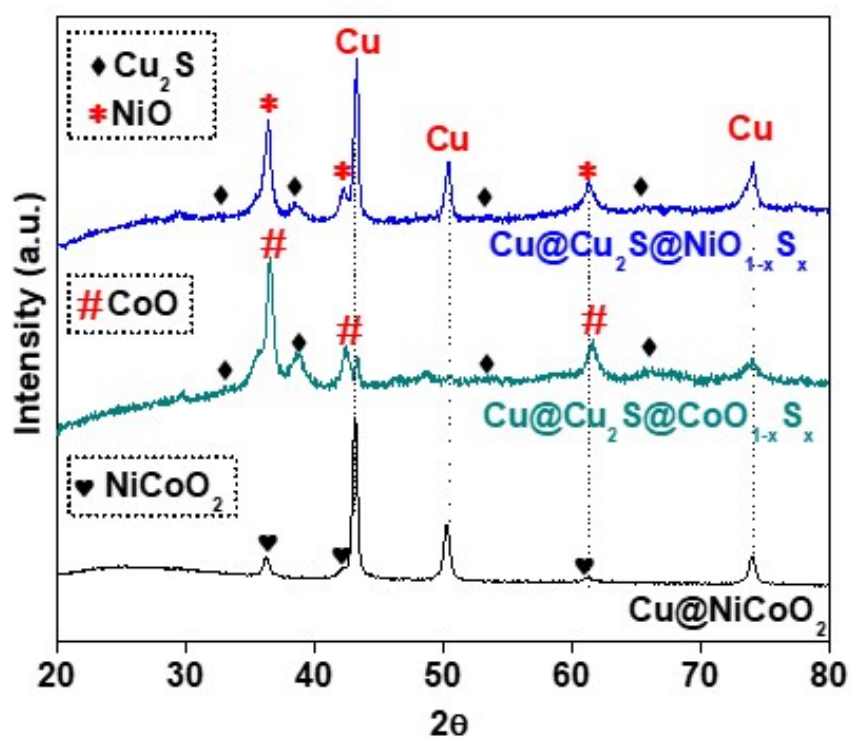

**Figure S5.** The crystalline structures of  $\text{Cu@NiCoO}_2$  NWs,  $\text{Cu@Cu}_2\text{S@NiO}_{1-x}\text{S}_x$  NWs, and  $\text{Cu@Cu}_2\text{S@CoO}_{1-x}\text{S}_x$  NWs.



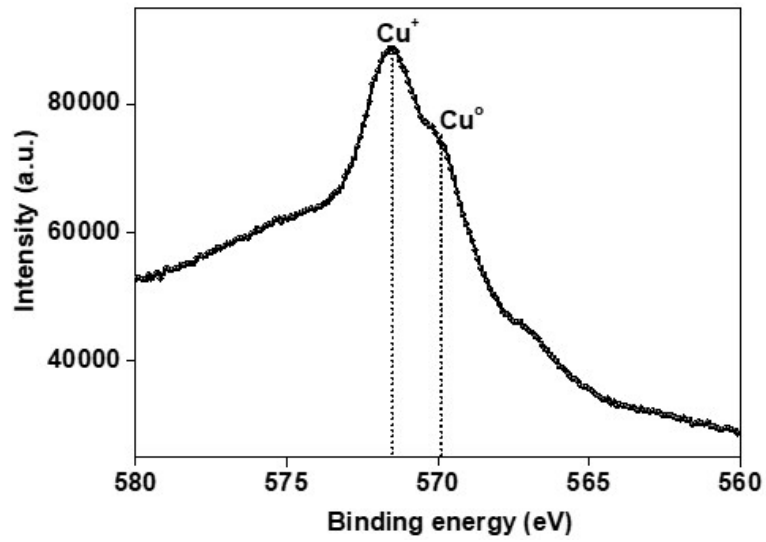

**Figure S6.** Cu(LMM) Auger spectrum of the Cu@Cu<sub>2</sub>S@NiCoO<sub>2-x</sub>S<sub>x</sub> NWs material.

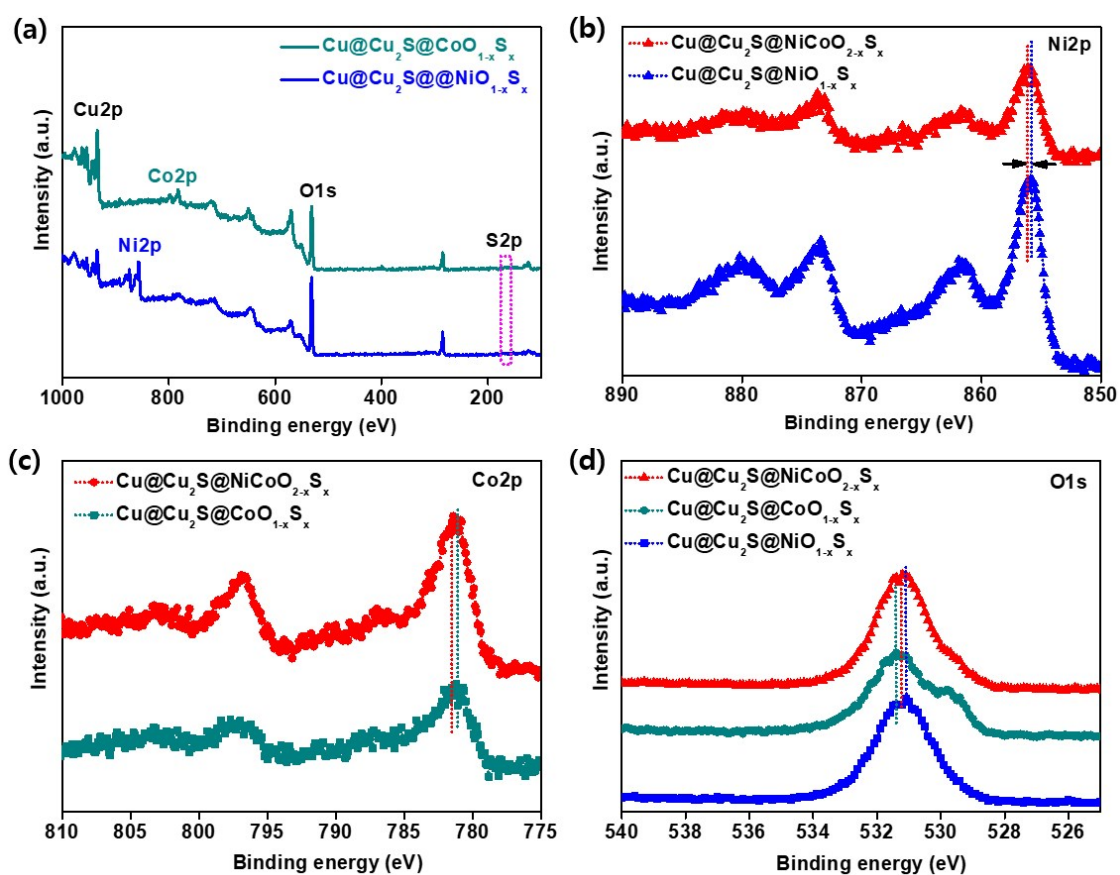

**Figure S7.** (a) Survey XPS spectra of Cu@Cu<sub>2</sub>S@NiO<sub>1-x</sub>S<sub>x</sub> NWs and Cu@Cu<sub>2</sub>S@CoO<sub>1-x</sub>S<sub>x</sub> NWs; (b) Comparison of Ni<sub>2</sub>p spectra between Cu@Cu<sub>2</sub>S@NiO<sub>1-x</sub>S<sub>x</sub> NWs and Cu@Cu<sub>2</sub>S@NiCoO<sub>2-x</sub>S<sub>x</sub> NWs; (c) Comparison of Co<sub>2</sub>p spectra between Cu@Cu<sub>2</sub>S@NiCoO<sub>2-x</sub>S<sub>x</sub> NWs and Cu@Cu<sub>2</sub>S@CoO<sub>1-x</sub>S<sub>x</sub> NWs; (d) Comparison of O<sub>1</sub>s spectra between Cu@Cu<sub>2</sub>S@NiCoO<sub>2-x</sub>S<sub>x</sub> NWs, Cu@Cu<sub>2</sub>S@CoO<sub>1-x</sub>S<sub>x</sub> NWs, and Cu@Cu<sub>2</sub>S@NiO<sub>1-x</sub>S<sub>x</sub> NWs.

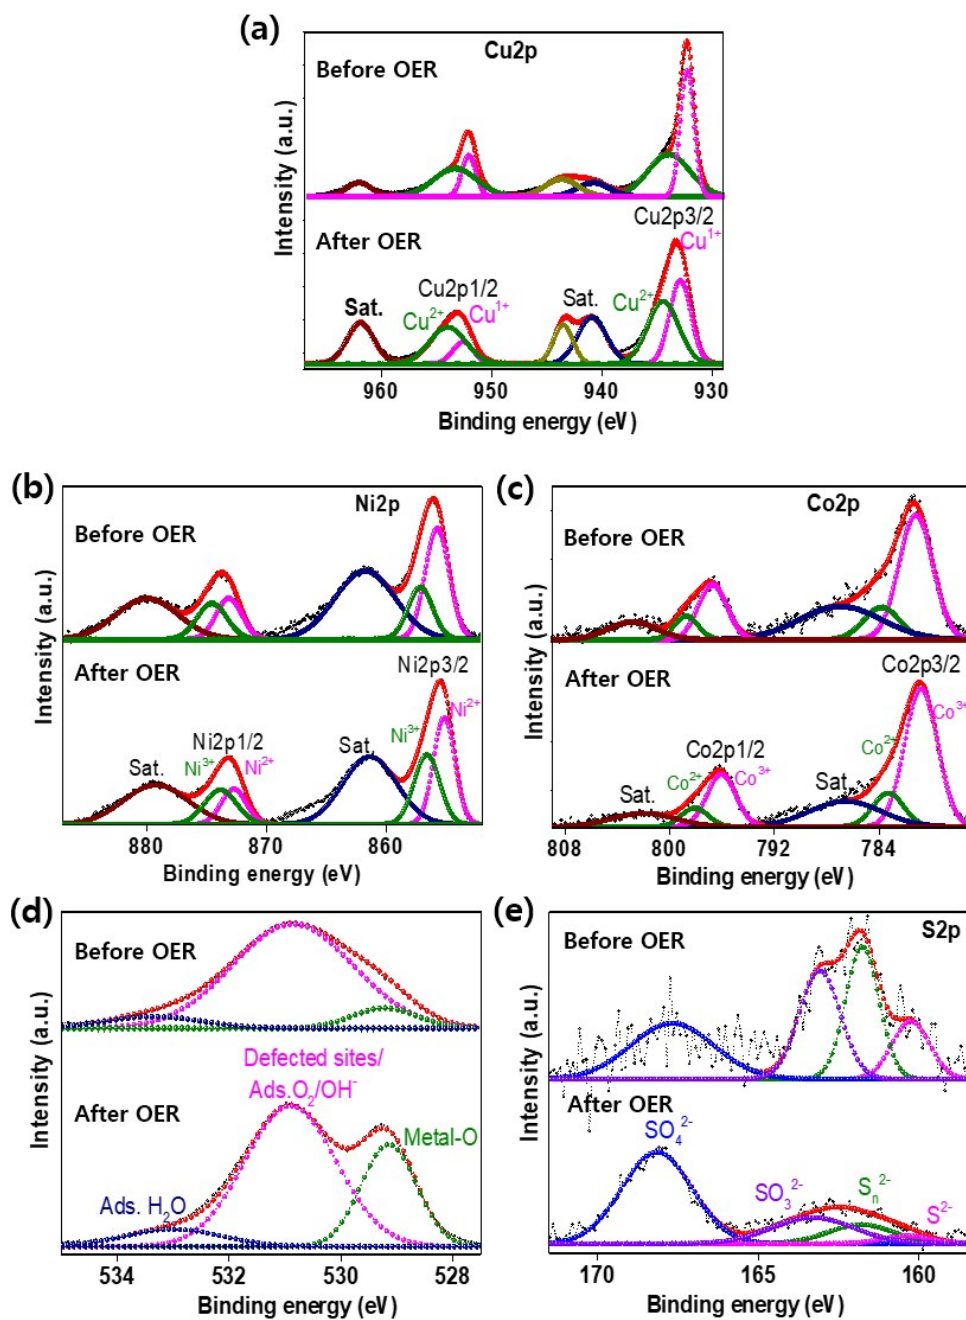

**Figure S8.** Comparison of (a) Cu2p, (b) Ni2p, (c) Co2p, (d) O1s, and (e) S2p XPS spectra of Cu@Cu<sub>2</sub>S@NiCoO<sub>2-x</sub>S<sub>x</sub> NWs before and after OER stability.

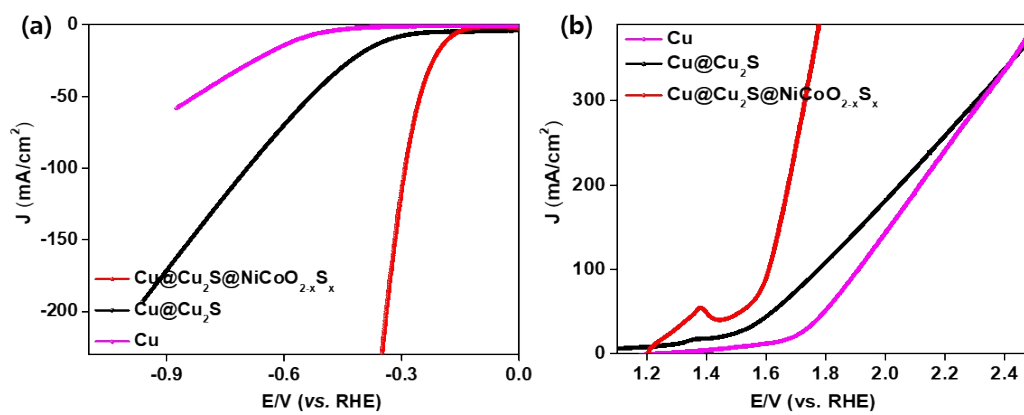

**Figure S9.** (a) HER and (b) OER performance of the Cu NWs, Cu@Cu<sub>2</sub>S NWs, Cu@Cu<sub>2</sub>S@NiCoO<sub>2-x</sub>S<sub>x</sub> NWs materials in 1.0 M KOH medium.

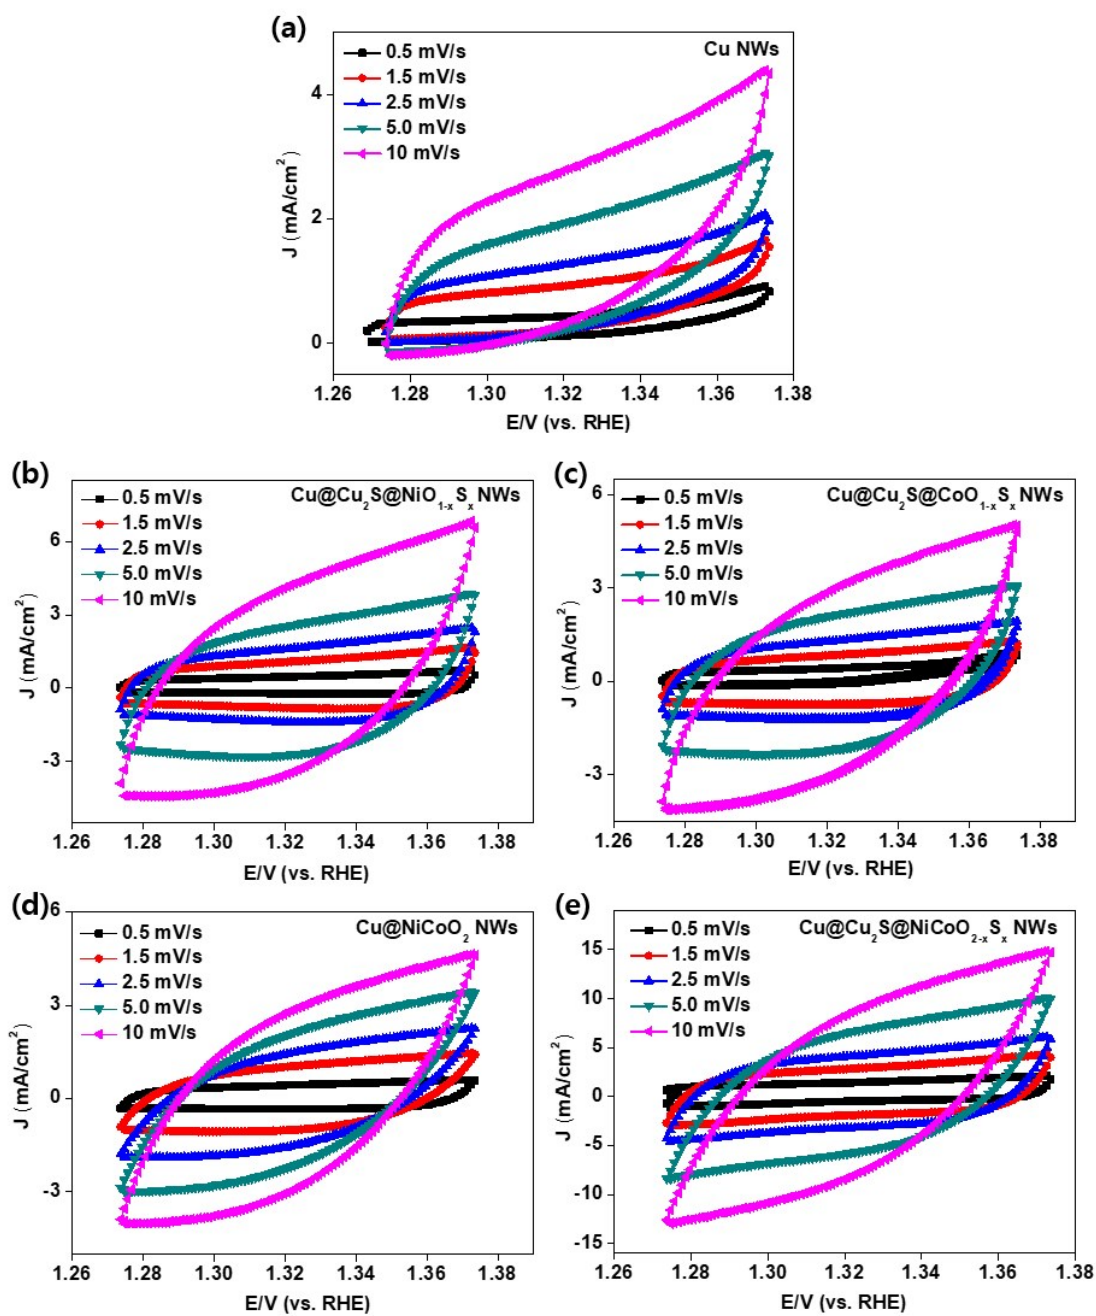

**Figure S10.** CV measurements in the potential range from 1.26 to 1.38 V (vs. RHE) at different scan rates: (a) Cu NWs, (b) Cu@Cu<sub>2</sub>S@NiO<sub>1-x</sub>S<sub>x</sub> NWs, (c) Cu@Cu<sub>2</sub>S@CoO<sub>1-x</sub>S<sub>x</sub> NWs, (d) Cu@NiCoO<sub>2</sub> NWs, and (e) Cu@Cu<sub>2</sub>S@NiCoO<sub>2-x</sub>S<sub>x</sub> NWs.

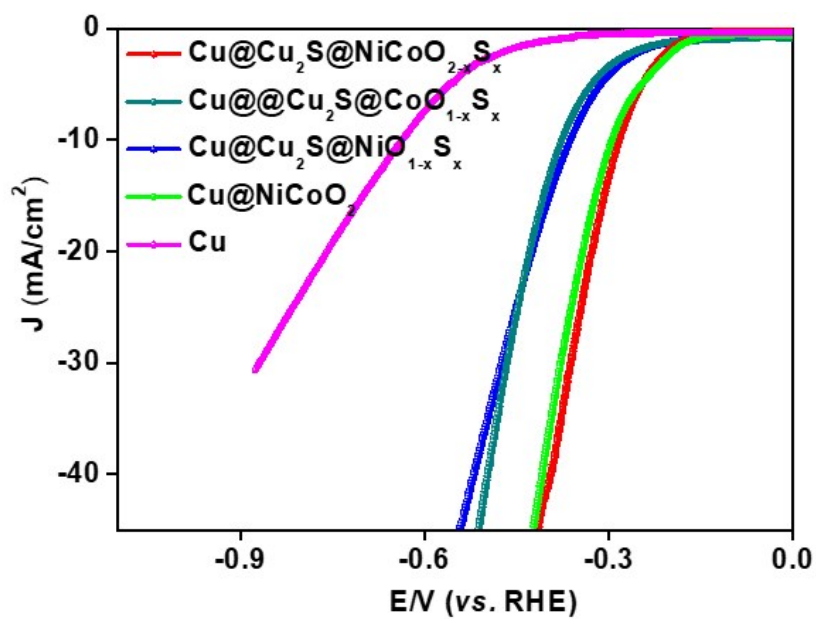

**Figure S11.** (C) LSV curves of materials towards HER normalized by the  $C_{dl}$  values.



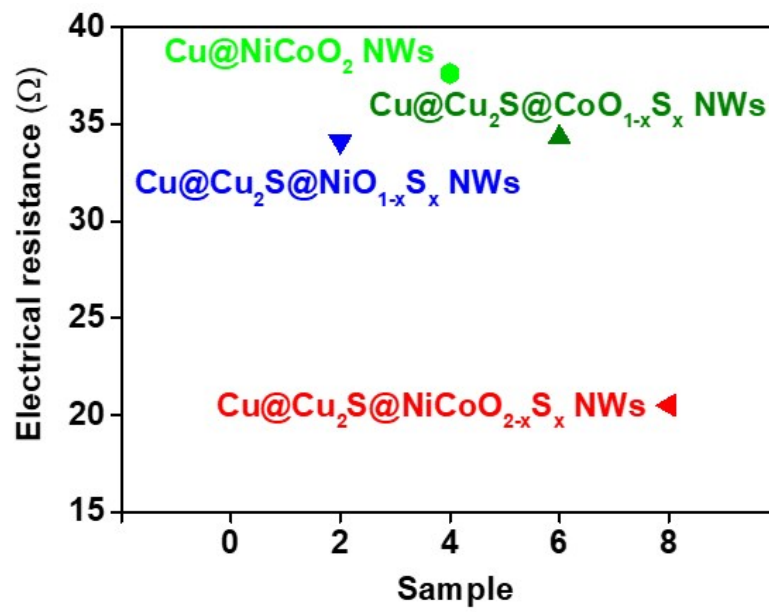

**Figure S12.** Electrical resistance of materials measured by 4-point probes method.

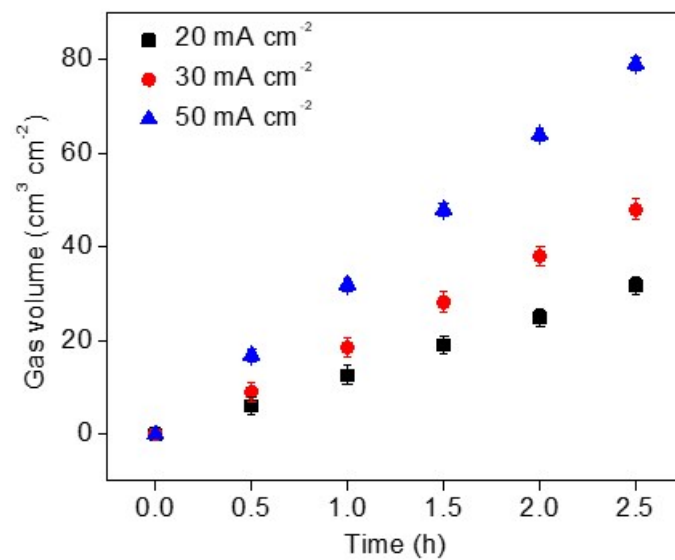

**Figure S13.** The evolution of total gas amount (H<sub>2</sub> + O<sub>2</sub>) at different operating currents and time periods.

**Table S1.** Comparison of the Tafel slope between Cu@Cu<sub>2</sub>S@NiCoO<sub>2-x</sub>S<sub>x</sub> NWs catalyst with previous reports in 1.0 M KOH medium.

| Electrocatalyst                                              | Tafel slope (mV<br>dec <sup>-1</sup> ) | References                                                   |
|--------------------------------------------------------------|----------------------------------------|--------------------------------------------------------------|
| Cu@Cu <sub>2</sub> S@NiCoO <sub>2-x</sub> S <sub>x</sub> NWs | 63                                     | <i>This work</i>                                             |
| NiCo <sub>2</sub> S <sub>4</sub> NA/CC                       | 141                                    | <i>Nanoscale</i> <b>2015</b> , 7, 15122                      |
| FeP NAs/CC                                                   | 45                                     | <i>ACS Catal.</i> <b>2014</b> , 4, 4065.                     |
| CoO <sub>x</sub> @CN on GCE                                  | 115                                    | <i>J. Am. Chem. Soc.</i> <b>2015</b> , 137, 2688             |
| PCPTF                                                        | 53                                     | <i>Adv. Mater.</i> <b>2015</b> , 27, 3175.                   |
| CeO <sub>2</sub> -Cu <sub>3</sub> P/NF                       | 132                                    | <i>Nanoscale</i> <b>2018</b> , 10, 2213.                     |
| Cu <sub>3</sub> P/CF                                         | 63                                     | <i>ACS Appl. Mater. Interfaces</i> <b>2016</b> , 8,<br>23037 |
| Pr <sub>0.5</sub> BSCF                                       | 45                                     | <i>Adv. Mater.</i> <b>2016</b> , 28, 6442.                   |
| Co-NRCNTs                                                    | 80                                     | <i>Angew. Chem. Int. Ed.</i> <b>2014</b> , 53, 4372.         |

**Table S2.** Comparison of the Tafel slope between Cu@Cu<sub>2</sub>S@NiCoO<sub>2-x</sub>S<sub>x</sub> catalyst with previous reports in 1.0 M KOH.

| Electrocatalyst                                                   | Tafel slope<br>(mV dec <sup>-1</sup> ) | References                                                             |
|-------------------------------------------------------------------|----------------------------------------|------------------------------------------------------------------------|
| Cu@Cu <sub>2</sub> S@NiCoO <sub>2-x</sub> S <sub>x</sub> NWs /3DF | 50                                     | This work                                                              |
| Porous Ni-P nanoplates/GCE                                        | 64                                     | <i>Energy Environ. Sci.</i> <b>2016</b> , <i>9</i> , 1246.             |
| NiFe LDHNS@DG                                                     | 52                                     | <i>Adv. Mater.</i> <b>2017</b> , <i>29</i> , 1700017.                  |
| B,N:Mo <sub>2</sub> C@BCN                                         | 61                                     | <i>ACS Catal.</i> <b>2018</b> , <i>8</i> , 8296.                       |
| Fe-Ni <sub>3</sub> C                                              | 62                                     | <i>Angew. Chem. Int. Ed.</i> <b>2017</b> , <i>56</i> ,<br>12566.       |
| Ru-RuP <sub>x</sub> -Co <sub>x</sub> P                            | 85                                     | <i>Nano Energy</i> <b>2018</b> , <i>53</i> , 270.                      |
| CoS/CeO <sub>x</sub>                                              | 50                                     | <i>Angew. Chem. Int. Ed.</i> <b>2018</b> , <i>130</i> ,<br>8790.       |
| Coral-like Ni <sub>3</sub> S <sub>2</sub> on Ni Foam              | 101                                    | <i>ACS Appl. Mater. Interfaces</i> <b>2018</b> , <i>10</i> ,<br>31330. |

## References

- [1] C.C.L. McCrory, S. Jung, J.C. Peters, T.F. Jaramillo, *J. Am. Chem. Soc.* 2013, **135**, 16977–16987.
- [2] H. Liang, A.N. Gandi, D.H. Anjum, X. Wang, U. Schwingenschlögl, H.N. Alshareef, *Nano Lett.*, 2016, **16**, 7718–7725.
- [3] X.D. Wang, H.Y. Chen, Y.F. Xu, J.F. Liao, B.X. Chen, H.S. Rao, D. Bin Kuang, C.Y. Su, *J. Mater. Chem. A.*, 2017, **5**, 7191–7199.
- [4] J. Kibsgaard, T.F. Jaramillo, *Angew. Chemie-Int. Ed.*, 2014, **53**, 14433–14437.
